# Supplementary material for: Citrus flavonoids, β-Glucan and organic acid feed additives decrease relative risk during Yersinia ruckeri O1 biotype 2 infection of rainbow trout (Oncorhynchus mykiss)
Source: PeerJ. 2020 Mar 4;8:e8706. doi: 10.7717/peerj.8706 (PMC7060755; doi:10.7717/peerj.8706)
Supplement: Supplemental Information 3 — See Materials & Methods for details on collection and statistical analyses. [file peerj-08-8706-s003.xlsx]

## Sheet: Exp. Feed Performance Data
Productive parameters	Control feed						Beta-glucan supplemented feed						Citrus flavonoid supplemented feed						Beta-gucan + organic acid feed supplement						Yeast cell wall supplemented feed
	Tank 1	Tank 2	Tank 3	Tank 4	Tank 5	Tank 6	Tank 1	Tank 2	Tank 3	Tank 4	Tank 5	Tank 6	Tank 1	Tank 2	Tank 3	Tank 4	Tank 5	Tank 6	Tank 1	Tank 2	Tank 3	Tank 4	Tank 5	Tank 6	Tank 1	Tank 2	Tank 3	Tank 4	Tank 5	Tank 6
Initial weight (g)	24.5333	26.3867	22.6594	24.8138	23.89	24.22	24.55	23.171	23.8733	23.8933	23.8567	22.6548	22.875	24.0767	24.9	24.7759	24.1333	24.0226	26.9276	24.4032	26.1586	24.6138	24.0367	25.2867	26.1967	26.1667	23.5633	23.94	23.77	23.6667
Initial number of fish	30	30	32	29	30	30	30	31	30	30	30	31	32	30	30	29	30	31	29	31	29	29	30	30	30	30	30	30	30	30
Initial Biomass (g)	736	791.6	725.1	719.6	716.7	726.6	736.5	718.3	716.2	716.8	715.7	702.3	732	722.3	747	718.5	724	744.7	780.9	756.5	758.6	713.8	721.1	758.6	785.9	785	706.9	718.2	713.1	710
Final weight (g)	53.8	56.7692	48.6875	54.7586	51.6333	51.6	51.7333	49.9677	53.8333	51.6667	54.1379	51.5	49	53.6	53.6	54.4828	53.2667	53.4667	58.2759	52.871	57.1724	55.4483	52.8333	55.0333	57.9	51.9333	52	52.3	50.5	51.6667
Final number of fish	30	13	32	29	30	30	30	31	30	30	29	30	32	30	30	29	30	30	29	31	29	29	30	30	30	30	30	30	30	30
Final Biomass (g)	1614	738	1558	1588	1549	1548	1552	1549	1615	1550	1570	1545	1568	1608	1608	1580	1598	1604	1690	1639	1658	1608	1585	1651	1737	1558	1560	1569	1515	1550
Dead biomass (g)	0	0	0	0	0	0	0	0	0	0	0	0	0	0	0	0	0	0	0	0	0	0	0	0	0	0	0	0	0	0
Growth (%)	119.293	115.144	114.867	120.678	116.129	113.047	110.726	115.648	125.496	116.239	126.93	127.325	114.208	122.622	115.261	119.903	120.718	122.568	116.417	116.656	118.561	125.273	119.803	117.638	121.02	98.4713	120.682	118.463	112.453	118.31
Consumed food (g)	550.9	551.5	548.5	584.9	589.3	592.7	537.9	540.9	566.2	587.9	542.8	536.5	558.5	566.9	529.4	538.6	537.1	538	534.7	537.8	537	535.9	542.2	539.6	496.8	544.2	526.4	557.9	567.9	532.7
Feeding days	37	37	37	37	36	36	37	37	37	37	36	36	37	37	37	37	36	36	37	37	37	37	36	36	37	37	37	37	36	36
Degree days	536.5	536.5	536.5	536.5	522	522	536.5	536.5	536.5	536.5	522	522	536.5	536.5	536.5	536.5	522	522	536.5	536.5	536.5	536.5	522	522	536.5	536.5	536.5	536.5	522	522
Specific Feed Rate (SFR)	1.33162	-21.3052	1.36131	1.44089	1.51581	1.51599	1.3288	1.35239	1.38441	1.47071	1.44631	1.45227	1.37544	1.38444	1.27407	1.33151	1.35148	1.39142	1.22725	1.27339	1.26173	1.31547	1.37302	1.30617	1.11963	1.30427	1.32006	1.38492	1.48238	1.37534
Feed Conversion Rate (FCR)	0.627449	-10.2892	0.658542	0.673538	0.708038	0.721573	0.659595	0.651138	0.629951	0.705593	0.635374	0.636644	0.668062	0.640059	0.614866	0.625189	0.614531	0.626091	0.588164	0.609405	0.597065	0.599307	0.627619	0.604662	0.522343	0.70401	0.617044	0.655736	0.708193	0.634167
Specific Grow Rate (SGR)	2.12227	2.07064	2.06716	2.13928	2.14085	2.10095	2.01457	2.07697	2.19765	2.08436	2.27631	2.28113	2.05885	2.16299	2.07211	2.12977	2.19921	2.2224	2.08659	2.08956	2.11322	2.19498	2.18767	2.16017	2.14347	1.85263	2.13933	2.11202	2.09319	2.16874
TGC	1.62047	1.61452	1.53169	1.64146	1.61615	1.58933	1.52796	1.55143	1.67093	1.57372	1.73225	1.70678	1.52954	1.64555	1.58489	1.63232	1.67192	1.68942	1.63968	1.58932	1.64747	1.68569	1.65973	1.66393	1.67512	1.42051	1.61344	1.59848	1.57283	1.63493
Survival (%)	100	43.3333	100	100	100	100	100	100	100	100	96.6667	96.7742	100	100	100	100	100	96.7742	100	100	100	100	100	100	100	100	100	100	100	100
Gain g	878	-53.6	832.9	868.4	832.3	821.4	815.5	830.7	898.8	833.2	854.3	842.7	836	885.7	861	861.5	874	859.3	909.1	882.5	899.4	894.2	863.9	892.4	951.1	773	853.1	850.8	801.9	840
Fat in diet (%)	22.5	22.5	22.5	22.5	22.5	22.5	22.2	22.2	22.2	22.2	22.2	22.2	22.5	22.5	22.5	22.5	22.5	22.5	22.2	22.2	22.2	22.2	22.2	22.2	22	22	22	22	22	22
Fat ingested through diet (g)	123.953	124.088	123.413	131.603	132.592	133.357	119.414	120.08	125.696	130.514	120.502	119.103	125.662	127.552	119.115	121.185	120.848	121.05	118.703	119.392	119.214	118.97	120.368	119.791	109.296	119.724	115.808	122.738	124.938	117.194
LER	7.08336	-0.431953	6.74891	6.59866	6.27713	6.15938	6.82919	6.9179	7.15056	6.384	7.08953	7.07539	6.65274	6.94381	7.22831	7.10897	7.23226	7.09872	7.65858	7.39164	7.54442	7.51619	7.17713	7.44963	8.70206	6.45652	7.3665	6.93184	6.41838	7.1676
Protein in diet (%)	47.7	47.7	47.7	47.7	47.7	47.7	47.5	47.5	47.5	47.5	47.5	47.5	48.6	48.6	48.6	48.6	48.6	48.6	48.6	48.6	48.6	48.6	48.6	48.6	47.9	47.9	47.9	47.9	47.9	47.9
Protein ingested (g)	262.779	263.066	261.635	278.997	281.096	282.718	255.502	256.927	268.945	279.253	257.83	254.838	271.431	275.513	257.288	261.76	261.031	261.468	259.864	261.371	260.982	260.447	263.509	262.246	237.967	260.672	252.146	267.234	272.024	255.163
PER	3.34121	-0.203752	3.18345	3.11257	2.96091	2.90537	3.19175	3.23321	3.34195	2.98368	3.31342	3.30681	3.07997	3.21473	3.34644	3.29119	3.34827	3.28644	3.49837	3.37643	3.44621	3.43332	3.27844	3.40292	3.99677	2.96541	3.38336	3.18373	2.9479	3.29201
		Due to technical faults, Control tank 2 is excluded from statistical analyses.

## Sheet: Exp. Infection Data
Day	Event	Tank	Diet
5	1	14	Beta-glucans + organic acid supplemented feed		Guide:
5	1	14	Beta-glucans + organic acid supplemented feed		Sortable representation of data from experimental infection experiment.
6	1	1	Control feed		The "Day" tab refers to experimental day post infection
6	1	1	Control feed		The "Event" tab refers to the occurrence of censoring ("0") or an event ("1", "mortality"). Please see materials & methods section for more information.
6	1	3	Citrus flavonoid supplemented feed		The "Tank" tab refers to the overall tank setups, reflecting all replicate tanks across the experimental setup.
6	1	3	Citrus flavonoid supplemented feed		The "Diet" tab refers to the nature of the experimental diet group. Please see materials & methods for more information.
6	1	3	Citrus flavonoid supplemented feed
6	1	4	Beta-glucans + organic acid supplemented feed
6	1	4	Beta-glucans + organic acid supplemented feed
6	1	5	Yeast cell wall supplemented feed
6	1	5	Yeast cell wall supplemented feed
6	1	7	Beta-glucan supplemented feed
6	1	8	Citrus flavonoid supplemented feed
6	1	9	Beta-glucans + organic acid supplemented feed
6	1	10	Yeast cell wall supplemented feed
6	1	10	Yeast cell wall supplemented feed
6	1	10	Yeast cell wall supplemented feed
6	1	11	Control feed
6	1	11	Control feed
6	1	11	Control feed
6	1	11	Control feed
6	1	11	Control feed
6	1	11	Control feed
6	1	11	Control feed
6	1	13	Citrus flavonoid supplemented feed
6	1	13	Citrus flavonoid supplemented feed
6	1	15	Yeast cell wall supplemented feed
6	1	17	Beta-glucan supplemented feed
7	1	1	Control feed
7	1	1	Control feed
7	1	1	Control feed
7	1	2	Beta-glucan supplemented feed
7	1	2	Beta-glucan supplemented feed
7	1	2	Beta-glucan supplemented feed
7	1	2	Beta-glucan supplemented feed
7	1	2	Beta-glucan supplemented feed
7	1	2	Beta-glucan supplemented feed
7	1	3	Citrus flavonoid supplemented feed
7	1	3	Citrus flavonoid supplemented feed
7	1	3	Citrus flavonoid supplemented feed
7	1	3	Citrus flavonoid supplemented feed
7	1	4	Beta-glucans + organic acid supplemented feed
7	1	4	Beta-glucans + organic acid supplemented feed
7	1	5	Yeast cell wall supplemented feed
7	1	5	Yeast cell wall supplemented feed
7	1	5	Yeast cell wall supplemented feed
7	1	7	Beta-glucan supplemented feed
7	1	8	Citrus flavonoid supplemented feed
7	1	8	Citrus flavonoid supplemented feed
7	1	8	Citrus flavonoid supplemented feed
7	1	9	Beta-glucans + organic acid supplemented feed
7	1	9	Beta-glucans + organic acid supplemented feed
7	1	9	Beta-glucans + organic acid supplemented feed
7	1	9	Beta-glucans + organic acid supplemented feed
7	1	10	Yeast cell wall supplemented feed
7	1	10	Yeast cell wall supplemented feed
7	1	10	Yeast cell wall supplemented feed
7	1	10	Yeast cell wall supplemented feed
7	1	10	Yeast cell wall supplemented feed
7	1	11	Control feed
7	1	11	Control feed
7	1	11	Control feed
7	1	12	Beta-glucan supplemented feed
7	1	13	Citrus flavonoid supplemented feed
7	1	13	Citrus flavonoid supplemented feed
7	1	14	Beta-glucans + organic acid supplemented feed
7	1	14	Beta-glucans + organic acid supplemented feed
7	1	14	Beta-glucans + organic acid supplemented feed
7	1	14	Beta-glucans + organic acid supplemented feed
7	1	14	Beta-glucans + organic acid supplemented feed
7	1	15	Yeast cell wall supplemented feed
7	1	15	Yeast cell wall supplemented feed
7	1	16	Control feed
7	1	16	Control feed
7	1	16	Control feed
7	1	16	Control feed
7	1	16	Control feed
7	1	16	Control feed
7	1	16	Control feed
7	1	17	Beta-glucan supplemented feed
7	1	17	Beta-glucan supplemented feed
7	1	17	Beta-glucan supplemented feed
7	1	18	Citrus flavonoid supplemented feed
7	1	19	Beta-glucans + organic acid supplemented feed
7	1	19	Beta-glucans + organic acid supplemented feed
7	1	20	Yeast cell wall supplemented feed
7	1	20	Yeast cell wall supplemented feed
7	1	20	Yeast cell wall supplemented feed
8	1	2	Beta-glucan supplemented feed
8	1	2	Beta-glucan supplemented feed
8	1	3	Citrus flavonoid supplemented feed
8	1	3	Citrus flavonoid supplemented feed
8	1	4	Beta-glucans + organic acid supplemented feed
8	1	4	Beta-glucans + organic acid supplemented feed
8	1	5	Yeast cell wall supplemented feed
8	1	7	Beta-glucan supplemented feed
8	1	7	Beta-glucan supplemented feed
8	1	8	Citrus flavonoid supplemented feed
8	1	8	Citrus flavonoid supplemented feed
8	1	8	Citrus flavonoid supplemented feed
8	1	9	Beta-glucans + organic acid supplemented feed
8	1	9	Beta-glucans + organic acid supplemented feed
8	1	9	Beta-glucans + organic acid supplemented feed
8	1	10	Yeast cell wall supplemented feed
8	1	10	Yeast cell wall supplemented feed
8	1	11	Control feed
8	1	11	Control feed
8	1	12	Beta-glucan supplemented feed
8	1	13	Citrus flavonoid supplemented feed
8	1	13	Citrus flavonoid supplemented feed
8	1	13	Citrus flavonoid supplemented feed
8	1	14	Beta-glucans + organic acid supplemented feed
8	1	15	Yeast cell wall supplemented feed
8	1	16	Control feed
8	1	16	Control feed
8	1	17	Beta-glucan supplemented feed
8	1	17	Beta-glucan supplemented feed
8	1	18	Citrus flavonoid supplemented feed
8	1	19	Beta-glucans + organic acid supplemented feed
8	1	20	Yeast cell wall supplemented feed
8	1	20	Yeast cell wall supplemented feed
8	1	20	Yeast cell wall supplemented feed
8	1	20	Yeast cell wall supplemented feed
9	1	1	Control feed
9	1	1	Control feed
9	1	1	Control feed
9	1	1	Control feed
9	1	1	Control feed
9	1	3	Citrus flavonoid supplemented feed
9	1	5	Yeast cell wall supplemented feed
9	1	5	Yeast cell wall supplemented feed
9	1	9	Beta-glucans + organic acid supplemented feed
9	1	9	Beta-glucans + organic acid supplemented feed
9	1	10	Yeast cell wall supplemented feed
9	1	11	Control feed
9	1	11	Control feed
9	1	11	Control feed
9	1	12	Beta-glucan supplemented feed
9	1	13	Citrus flavonoid supplemented feed
9	1	13	Citrus flavonoid supplemented feed
9	1	15	Yeast cell wall supplemented feed
9	1	16	Control feed
9	1	16	Control feed
9	1	19	Beta-glucans + organic acid supplemented feed
9	1	20	Yeast cell wall supplemented feed
10	1	1	Control feed
10	1	2	Beta-glucan supplemented feed
10	1	4	Beta-glucans + organic acid supplemented feed
10	1	4	Beta-glucans + organic acid supplemented feed
10	1	4	Beta-glucans + organic acid supplemented feed
10	1	8	Citrus flavonoid supplemented feed
10	1	10	Yeast cell wall supplemented feed
10	1	10	Yeast cell wall supplemented feed
10	1	10	Yeast cell wall supplemented feed
10	1	11	Control feed
10	1	12	Beta-glucan supplemented feed
10	1	12	Beta-glucan supplemented feed
10	1	12	Beta-glucan supplemented feed
10	1	13	Citrus flavonoid supplemented feed
10	1	13	Citrus flavonoid supplemented feed
10	1	14	Beta-glucans + organic acid supplemented feed
10	1	14	Beta-glucans + organic acid supplemented feed
10	1	14	Beta-glucans + organic acid supplemented feed
10	1	16	Control feed
10	1	17	Beta-glucan supplemented feed
10	1	17	Beta-glucan supplemented feed
10	1	17	Beta-glucan supplemented feed
10	1	20	Yeast cell wall supplemented feed
10	1	20	Yeast cell wall supplemented feed
10	1	20	Yeast cell wall supplemented feed
10	1	20	Yeast cell wall supplemented feed
11	1	1	Control feed
11	1	1	Control feed
11	1	1	Control feed
11	1	2	Beta-glucan supplemented feed
11	1	3	Citrus flavonoid supplemented feed
11	1	4	Beta-glucans + organic acid supplemented feed
11	1	5	Yeast cell wall supplemented feed
11	1	5	Yeast cell wall supplemented feed
11	1	7	Beta-glucan supplemented feed
11	1	7	Beta-glucan supplemented feed
11	1	7	Beta-glucan supplemented feed
11	1	8	Citrus flavonoid supplemented feed
11	1	8	Citrus flavonoid supplemented feed
11	1	10	Yeast cell wall supplemented feed
11	1	10	Yeast cell wall supplemented feed
11	1	10	Yeast cell wall supplemented feed
11	1	11	Control feed
11	1	12	Beta-glucan supplemented feed
11	1	13	Citrus flavonoid supplemented feed
11	1	13	Citrus flavonoid supplemented feed
11	1	14	Beta-glucans + organic acid supplemented feed
11	1	14	Beta-glucans + organic acid supplemented feed
11	1	14	Beta-glucans + organic acid supplemented feed
11	1	15	Yeast cell wall supplemented feed
11	1	15	Yeast cell wall supplemented feed
11	1	16	Control feed
11	1	17	Beta-glucan supplemented feed
11	1	18	Citrus flavonoid supplemented feed
11	1	18	Citrus flavonoid supplemented feed
11	1	18	Citrus flavonoid supplemented feed
11	1	18	Citrus flavonoid supplemented feed
11	1	19	Beta-glucans + organic acid supplemented feed
11	1	19	Beta-glucans + organic acid supplemented feed
11	1	19	Beta-glucans + organic acid supplemented feed
11	1	20	Yeast cell wall supplemented feed
12	1	2	Beta-glucan supplemented feed
12	1	3	Citrus flavonoid supplemented feed
12	1	3	Citrus flavonoid supplemented feed
12	1	4	Beta-glucans + organic acid supplemented feed
12	1	5	Yeast cell wall supplemented feed
12	1	5	Yeast cell wall supplemented feed
12	1	7	Beta-glucan supplemented feed
12	1	7	Beta-glucan supplemented feed
12	1	7	Beta-glucan supplemented feed
12	1	9	Beta-glucans + organic acid supplemented feed
12	1	9	Beta-glucans + organic acid supplemented feed
12	1	10	Yeast cell wall supplemented feed
12	1	11	Control feed
12	1	11	Control feed
12	1	11	Control feed
12	1	12	Beta-glucan supplemented feed
12	1	12	Beta-glucan supplemented feed
12	1	12	Beta-glucan supplemented feed
12	1	12	Beta-glucan supplemented feed
12	1	13	Citrus flavonoid supplemented feed
12	1	14	Beta-glucans + organic acid supplemented feed
12	1	14	Beta-glucans + organic acid supplemented feed
12	1	15	Yeast cell wall supplemented feed
12	1	15	Yeast cell wall supplemented feed
12	1	15	Yeast cell wall supplemented feed
12	1	16	Control feed
12	1	16	Control feed
12	1	17	Beta-glucan supplemented feed
12	1	17	Beta-glucan supplemented feed
12	1	17	Beta-glucan supplemented feed
12	1	17	Beta-glucan supplemented feed
12	1	19	Beta-glucans + organic acid supplemented feed
12	1	19	Beta-glucans + organic acid supplemented feed
12	1	20	Yeast cell wall supplemented feed
12	1	20	Yeast cell wall supplemented feed
12	1	20	Yeast cell wall supplemented feed
13	1	1	Control feed
13	1	1	Control feed
13	1	2	Beta-glucan supplemented feed
13	1	3	Citrus flavonoid supplemented feed
13	1	3	Citrus flavonoid supplemented feed
13	1	7	Beta-glucan supplemented feed
13	1	7	Beta-glucan supplemented feed
13	1	7	Beta-glucan supplemented feed
13	1	7	Beta-glucan supplemented feed
13	1	7	Beta-glucan supplemented feed
13	1	8	Citrus flavonoid supplemented feed
13	1	8	Citrus flavonoid supplemented feed
13	1	8	Citrus flavonoid supplemented feed
13	1	9	Beta-glucans + organic acid supplemented feed
13	1	10	Yeast cell wall supplemented feed
13	1	12	Beta-glucan supplemented feed
13	1	13	Citrus flavonoid supplemented feed
13	1	14	Beta-glucans + organic acid supplemented feed
13	1	14	Beta-glucans + organic acid supplemented feed
13	1	15	Yeast cell wall supplemented feed
13	1	16	Control feed
13	1	18	Citrus flavonoid supplemented feed
13	1	18	Citrus flavonoid supplemented feed
13	1	18	Citrus flavonoid supplemented feed
13	1	19	Beta-glucans + organic acid supplemented feed
13	1	19	Beta-glucans + organic acid supplemented feed
14	1	3	Citrus flavonoid supplemented feed
14	1	7	Beta-glucan supplemented feed
14	1	9	Beta-glucans + organic acid supplemented feed
14	1	11	Control feed
14	1	11	Control feed
14	1	12	Beta-glucan supplemented feed
14	1	13	Citrus flavonoid supplemented feed
14	1	18	Citrus flavonoid supplemented feed
14	1	18	Citrus flavonoid supplemented feed
15	1	8	Citrus flavonoid supplemented feed
15	1	10	Yeast cell wall supplemented feed
15	1	10	Yeast cell wall supplemented feed
15	1	15	Yeast cell wall supplemented feed
15	1	15	Yeast cell wall supplemented feed
15	1	16	Control feed
15	1	17	Beta-glucan supplemented feed
15	1	17	Beta-glucan supplemented feed
15	1	17	Beta-glucan supplemented feed
15	1	17	Beta-glucan supplemented feed
15	1	18	Citrus flavonoid supplemented feed
15	1	19	Beta-glucans + organic acid supplemented feed
15	1	19	Beta-glucans + organic acid supplemented feed
16	1	7	Beta-glucan supplemented feed
16	1	13	Citrus flavonoid supplemented feed
16	1	18	Citrus flavonoid supplemented feed
16	1	19	Beta-glucans + organic acid supplemented feed
17	1	7	Beta-glucan supplemented feed
18	1	4	Beta-glucans + organic acid supplemented feed
18	1	4	Beta-glucans + organic acid supplemented feed
18	1	16	Control feed
18	1	18	Citrus flavonoid supplemented feed
19	1	17	Beta-glucan supplemented feed
19	1	18	Citrus flavonoid supplemented feed
21	1	1	Control feed
22	0	1	Control feed
22	0	1	Control feed
22	0	1	Control feed
22	0	1	Control feed
22	0	1	Control feed
22	0	1	Control feed
22	0	1	Control feed
22	0	1	Control feed
22	0	1	Control feed
22	0	1	Control feed
22	0	1	Control feed
22	0	1	Control feed
22	0	1	Control feed
22	0	2	Beta-glucan supplemented feed
22	0	2	Beta-glucan supplemented feed
22	0	2	Beta-glucan supplemented feed
22	0	2	Beta-glucan supplemented feed
22	0	2	Beta-glucan supplemented feed
22	0	2	Beta-glucan supplemented feed
22	0	2	Beta-glucan supplemented feed
22	0	2	Beta-glucan supplemented feed
22	0	2	Beta-glucan supplemented feed
22	0	2	Beta-glucan supplemented feed
22	0	2	Beta-glucan supplemented feed
22	0	2	Beta-glucan supplemented feed
22	0	2	Beta-glucan supplemented feed
22	0	2	Beta-glucan supplemented feed
22	0	2	Beta-glucan supplemented feed
22	0	2	Beta-glucan supplemented feed
22	0	2	Beta-glucan supplemented feed
22	0	2	Beta-glucan supplemented feed
22	0	3	Citrus flavonoid supplemented feed
22	0	3	Citrus flavonoid supplemented feed
22	0	3	Citrus flavonoid supplemented feed
22	0	3	Citrus flavonoid supplemented feed
22	0	3	Citrus flavonoid supplemented feed
22	0	3	Citrus flavonoid supplemented feed
22	0	3	Citrus flavonoid supplemented feed
22	0	3	Citrus flavonoid supplemented feed
22	0	3	Citrus flavonoid supplemented feed
22	0	3	Citrus flavonoid supplemented feed
22	0	3	Citrus flavonoid supplemented feed
22	0	3	Citrus flavonoid supplemented feed
22	0	3	Citrus flavonoid supplemented feed
22	0	3	Citrus flavonoid supplemented feed
22	0	3	Citrus flavonoid supplemented feed
22	0	3	Citrus flavonoid supplemented feed
22	0	4	Beta-glucans + organic acid supplemented feed
22	0	4	Beta-glucans + organic acid supplemented feed
22	0	4	Beta-glucans + organic acid supplemented feed
22	0	4	Beta-glucans + organic acid supplemented feed
22	0	4	Beta-glucans + organic acid supplemented feed
22	0	4	Beta-glucans + organic acid supplemented feed
22	0	4	Beta-glucans + organic acid supplemented feed
22	0	4	Beta-glucans + organic acid supplemented feed
22	0	4	Beta-glucans + organic acid supplemented feed
22	0	4	Beta-glucans + organic acid supplemented feed
22	0	4	Beta-glucans + organic acid supplemented feed
22	0	4	Beta-glucans + organic acid supplemented feed
22	0	4	Beta-glucans + organic acid supplemented feed
22	0	4	Beta-glucans + organic acid supplemented feed
22	0	4	Beta-glucans + organic acid supplemented feed
22	0	4	Beta-glucans + organic acid supplemented feed
22	0	5	Yeast cell wall supplemented feed
22	0	5	Yeast cell wall supplemented feed
22	0	5	Yeast cell wall supplemented feed
22	0	5	Yeast cell wall supplemented feed
22	0	5	Yeast cell wall supplemented feed
22	0	5	Yeast cell wall supplemented feed
22	0	5	Yeast cell wall supplemented feed
22	0	5	Yeast cell wall supplemented feed
22	0	5	Yeast cell wall supplemented feed
22	0	5	Yeast cell wall supplemented feed
22	0	5	Yeast cell wall supplemented feed
22	0	5	Yeast cell wall supplemented feed
22	0	5	Yeast cell wall supplemented feed
22	0	5	Yeast cell wall supplemented feed
22	0	5	Yeast cell wall supplemented feed
22	0	5	Yeast cell wall supplemented feed
22	0	5	Yeast cell wall supplemented feed
22	0	5	Yeast cell wall supplemented feed
22	0	7	Beta-glucan supplemented feed
22	0	7	Beta-glucan supplemented feed
22	0	7	Beta-glucan supplemented feed
22	0	7	Beta-glucan supplemented feed
22	0	7	Beta-glucan supplemented feed
22	0	7	Beta-glucan supplemented feed
22	0	7	Beta-glucan supplemented feed
22	0	7	Beta-glucan supplemented feed
22	0	7	Beta-glucan supplemented feed
22	0	7	Beta-glucan supplemented feed
22	0	7	Beta-glucan supplemented feed
22	0	7	Beta-glucan supplemented feed
22	0	7	Beta-glucan supplemented feed
22	0	8	Citrus flavonoid supplemented feed
22	0	8	Citrus flavonoid supplemented feed
22	0	8	Citrus flavonoid supplemented feed
22	0	8	Citrus flavonoid supplemented feed
22	0	8	Citrus flavonoid supplemented feed
22	0	8	Citrus flavonoid supplemented feed
22	0	8	Citrus flavonoid supplemented feed
22	0	8	Citrus flavonoid supplemented feed
22	0	8	Citrus flavonoid supplemented feed
22	0	8	Citrus flavonoid supplemented feed
22	0	8	Citrus flavonoid supplemented feed
22	0	8	Citrus flavonoid supplemented feed
22	0	8	Citrus flavonoid supplemented feed
22	0	8	Citrus flavonoid supplemented feed
22	0	8	Citrus flavonoid supplemented feed
22	0	8	Citrus flavonoid supplemented feed
22	0	9	Beta-glucans + organic acid supplemented feed
22	0	9	Beta-glucans + organic acid supplemented feed
22	0	9	Beta-glucans + organic acid supplemented feed
22	0	9	Beta-glucans + organic acid supplemented feed
22	0	9	Beta-glucans + organic acid supplemented feed
22	0	9	Beta-glucans + organic acid supplemented feed
22	0	9	Beta-glucans + organic acid supplemented feed
22	0	9	Beta-glucans + organic acid supplemented feed
22	0	9	Beta-glucans + organic acid supplemented feed
22	0	9	Beta-glucans + organic acid supplemented feed
22	0	9	Beta-glucans + organic acid supplemented feed
22	0	9	Beta-glucans + organic acid supplemented feed
22	0	9	Beta-glucans + organic acid supplemented feed
22	0	9	Beta-glucans + organic acid supplemented feed
22	0	9	Beta-glucans + organic acid supplemented feed
22	0	9	Beta-glucans + organic acid supplemented feed
22	0	9	Beta-glucans + organic acid supplemented feed
22	0	10	Yeast cell wall supplemented feed
22	0	10	Yeast cell wall supplemented feed
22	0	10	Yeast cell wall supplemented feed
22	0	10	Yeast cell wall supplemented feed
22	0	10	Yeast cell wall supplemented feed
22	0	10	Yeast cell wall supplemented feed
22	0	10	Yeast cell wall supplemented feed
22	0	10	Yeast cell wall supplemented feed
22	0	10	Yeast cell wall supplemented feed
22	0	11	Control feed
22	0	11	Control feed
22	0	11	Control feed
22	0	11	Control feed
22	0	11	Control feed
22	0	11	Control feed
22	0	11	Control feed
22	0	11	Control feed
22	0	11	Control feed
22	0	11	Control feed
22	0	12	Beta-glucan supplemented feed
22	0	12	Beta-glucan supplemented feed
22	0	12	Beta-glucan supplemented feed
22	0	12	Beta-glucan supplemented feed
22	0	12	Beta-glucan supplemented feed
22	0	12	Beta-glucan supplemented feed
22	0	12	Beta-glucan supplemented feed
22	0	12	Beta-glucan supplemented feed
22	0	12	Beta-glucan supplemented feed
22	0	12	Beta-glucan supplemented feed
22	0	12	Beta-glucan supplemented feed
22	0	12	Beta-glucan supplemented feed
22	0	12	Beta-glucan supplemented feed
22	0	12	Beta-glucan supplemented feed
22	0	12	Beta-glucan supplemented feed
22	0	12	Beta-glucan supplemented feed
22	0	12	Beta-glucan supplemented feed
22	0	13	Citrus flavonoid supplemented feed
22	0	13	Citrus flavonoid supplemented feed
22	0	13	Citrus flavonoid supplemented feed
22	0	13	Citrus flavonoid supplemented feed
22	0	13	Citrus flavonoid supplemented feed
22	0	13	Citrus flavonoid supplemented feed
22	0	13	Citrus flavonoid supplemented feed
22	0	13	Citrus flavonoid supplemented feed
22	0	13	Citrus flavonoid supplemented feed
22	0	13	Citrus flavonoid supplemented feed
22	0	13	Citrus flavonoid supplemented feed
22	0	13	Citrus flavonoid supplemented feed
22	0	13	Citrus flavonoid supplemented feed
22	0	14	Beta-glucans + organic acid supplemented feed
22	0	14	Beta-glucans + organic acid supplemented feed
22	0	14	Beta-glucans + organic acid supplemented feed
22	0	14	Beta-glucans + organic acid supplemented feed
22	0	14	Beta-glucans + organic acid supplemented feed
22	0	14	Beta-glucans + organic acid supplemented feed
22	0	14	Beta-glucans + organic acid supplemented feed
22	0	14	Beta-glucans + organic acid supplemented feed
22	0	14	Beta-glucans + organic acid supplemented feed
22	0	14	Beta-glucans + organic acid supplemented feed
22	0	14	Beta-glucans + organic acid supplemented feed
22	0	15	Yeast cell wall supplemented feed
22	0	15	Yeast cell wall supplemented feed
22	0	15	Yeast cell wall supplemented feed
22	0	15	Yeast cell wall supplemented feed
22	0	15	Yeast cell wall supplemented feed
22	0	15	Yeast cell wall supplemented feed
22	0	15	Yeast cell wall supplemented feed
22	0	15	Yeast cell wall supplemented feed
22	0	15	Yeast cell wall supplemented feed
22	0	15	Yeast cell wall supplemented feed
22	0	15	Yeast cell wall supplemented feed
22	0	15	Yeast cell wall supplemented feed
22	0	15	Yeast cell wall supplemented feed
22	0	15	Yeast cell wall supplemented feed
22	0	15	Yeast cell wall supplemented feed
22	0	15	Yeast cell wall supplemented feed
22	0	15	Yeast cell wall supplemented feed
22	0	16	Control feed
22	0	16	Control feed
22	0	16	Control feed
22	0	16	Control feed
22	0	16	Control feed
22	0	16	Control feed
22	0	16	Control feed
22	0	16	Control feed
22	0	16	Control feed
22	0	16	Control feed
22	0	16	Control feed
22	0	17	Beta-glucan supplemented feed
22	0	17	Beta-glucan supplemented feed
22	0	17	Beta-glucan supplemented feed
22	0	17	Beta-glucan supplemented feed
22	0	17	Beta-glucan supplemented feed
22	0	17	Beta-glucan supplemented feed
22	0	17	Beta-glucan supplemented feed
22	0	17	Beta-glucan supplemented feed
22	0	17	Beta-glucan supplemented feed
22	0	17	Beta-glucan supplemented feed
22	0	17	Beta-glucan supplemented feed
22	0	18	Citrus flavonoid supplemented feed
22	0	18	Citrus flavonoid supplemented feed
22	0	18	Citrus flavonoid supplemented feed
22	0	18	Citrus flavonoid supplemented feed
22	0	18	Citrus flavonoid supplemented feed
22	0	18	Citrus flavonoid supplemented feed
22	0	18	Citrus flavonoid supplemented feed
22	0	18	Citrus flavonoid supplemented feed
22	0	18	Citrus flavonoid supplemented feed
22	0	18	Citrus flavonoid supplemented feed
22	0	18	Citrus flavonoid supplemented feed
22	0	18	Citrus flavonoid supplemented feed
22	0	18	Citrus flavonoid supplemented feed
22	0	18	Citrus flavonoid supplemented feed
22	0	19	Beta-glucans + organic acid supplemented feed
22	0	19	Beta-glucans + organic acid supplemented feed
22	0	19	Beta-glucans + organic acid supplemented feed
22	0	19	Beta-glucans + organic acid supplemented feed
22	0	19	Beta-glucans + organic acid supplemented feed
22	0	19	Beta-glucans + organic acid supplemented feed
22	0	19	Beta-glucans + organic acid supplemented feed
22	0	19	Beta-glucans + organic acid supplemented feed
22	0	19	Beta-glucans + organic acid supplemented feed
22	0	19	Beta-glucans + organic acid supplemented feed
22	0	19	Beta-glucans + organic acid supplemented feed
22	0	19	Beta-glucans + organic acid supplemented feed
22	0	19	Beta-glucans + organic acid supplemented feed
22	0	19	Beta-glucans + organic acid supplemented feed
22	0	19	Beta-glucans + organic acid supplemented feed
22	0	20	Yeast cell wall supplemented feed
22	0	20	Yeast cell wall supplemented feed
22	0	20	Yeast cell wall supplemented feed
22	0	20	Yeast cell wall supplemented feed
22	0	20	Yeast cell wall supplemented feed
22	0	20	Yeast cell wall supplemented feed
22	0	20	Yeast cell wall supplemented feed
22	0	20	Yeast cell wall supplemented feed
22	0	20	Yeast cell wall supplemented feed
22	0	20	Yeast cell wall supplemented feed
22	0	20	Yeast cell wall supplemented feed
22	0	20	Yeast cell wall supplemented feed
22	0	20	Yeast cell wall supplemented feed
22	0	20	Yeast cell wall supplemented feed
